# Supplementary material
Source: MDPI journal article supplement (https://www.mdpi.com/2218-0532/91/1/9)
Supplement: s1 [file s1]

# Antimicrobial Activity of Novel Deep Eutectic Solvents

Noor Akbar <sup>1,2</sup>, Naveed Ahmed Khan <sup>2,3,\*</sup>, Taleb Ibrahim <sup>4</sup>, Mustafa Khamis <sup>1</sup>, Amir Sada Khan <sup>4</sup>, Ahmad M. Alharbi <sup>5</sup>, Hasan Alfahemi <sup>6</sup> and Ruqaiyyah Siddiqui <sup>1,3</sup>

<sup>1</sup> College of Arts and Sciences, American University of Sharjah, University City, Sharjah 26666, United Arab Emirates; noor@yahoo.com (N.A.); mkhamis@aus.edu (M.K.); ruqaiyyahsiddiqui35@gmail.com (R.S.)

<sup>2</sup> Department of Clinical Sciences, College of Medicine, University of Sharjah, University City, Sharjah P.O. Box 27272, United Arab Emirates

<sup>3</sup> Department of Medical Biology, Faculty of Medicine, Istinye University, Istanbul 34010, Turkey

<sup>4</sup> Department of Chemical Engineering, American University of Sharjah, Sharjah P.O. Box 26666, United Arab Emirates; taleb@yahoo.com (T.I.); amir@yahoo.com (A.S.K.)

<sup>5</sup> Department of Clinical Laboratory Sciences, College of Applied Medical Sciences, Taif University, Taif 21944, Saudi Arabia; a.alharbi@tu.edu.sa

<sup>6</sup> Department of Medical Microbiology, Faculty of Medicine, Al-Baha University, P. O. Box. 1988, Al-Baha 65799, Saudi Arabia; halfahmi@bu.edu.sa

\* Correspondence: naveed5438@gmail.com; Tel.: +971-6505-7722

Supplementary data.

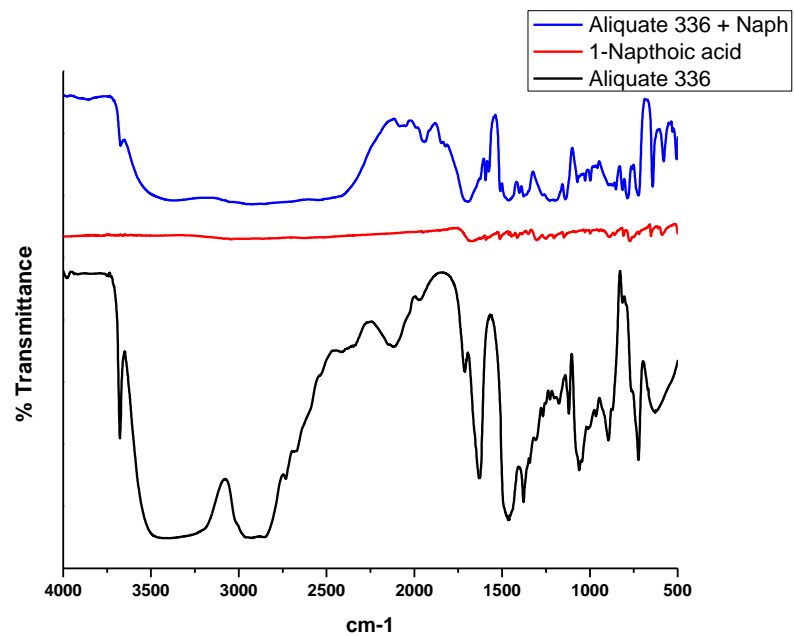

Figure S1 DES 2.

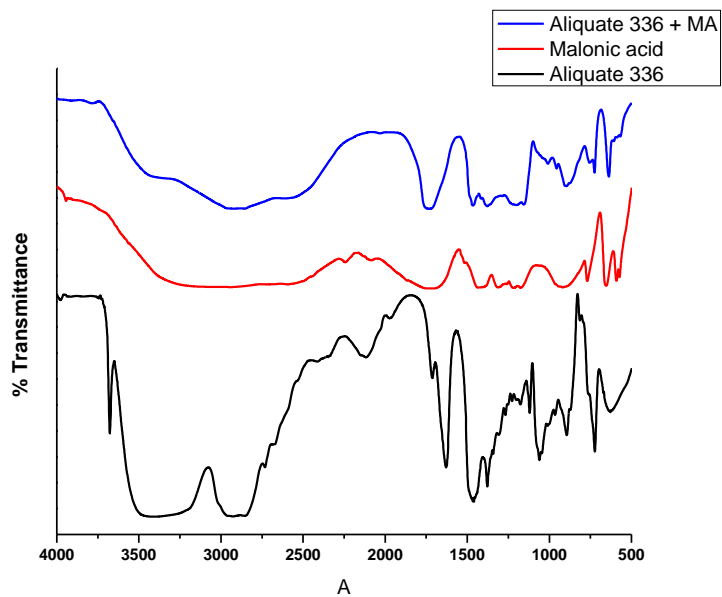

Figure S2 DES 3.

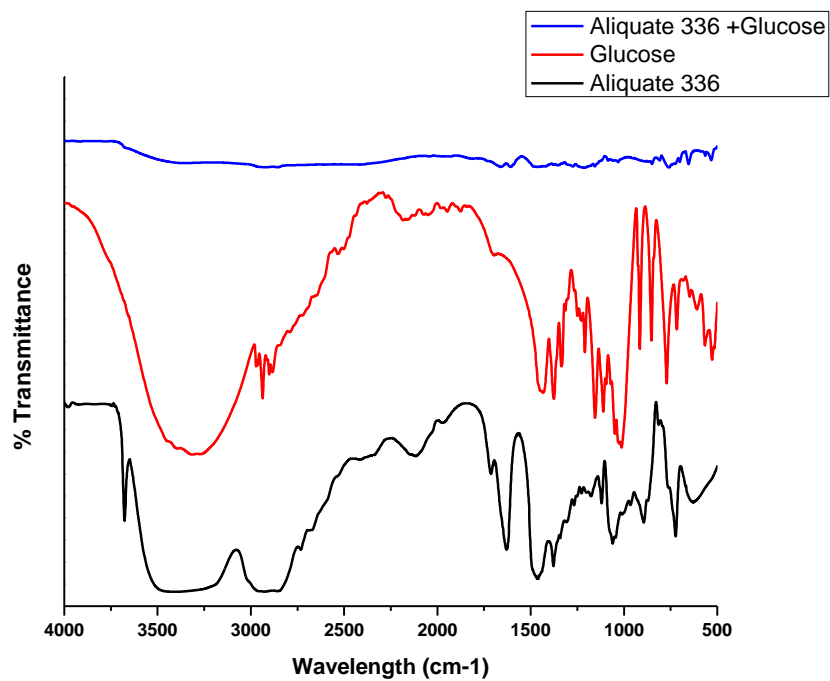

Figure S3 DES 7

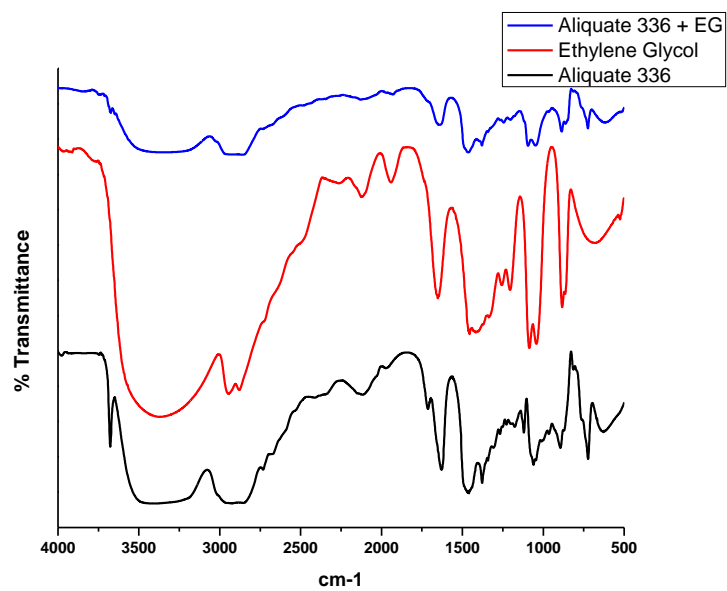

Figure S4 DES 8
